# Supplementary material for: A flexible and sensitive electrochemical sensing platform based on dimethyl sulfoxide modified carbon cloth: towards the detection of dopamine and carvedilol
Source: Royal Society of Chemistry journal article supplement (doi:10.1039/d2ay01922a), 2023-01-01
Supplement: d2ay01922a1.pdf [file d2ay01922a1.pdf]

**A flexible and sensitive electrochemical sensing platform based on dimethyl sulfoxide modified carbon cloth: towards the detection of dopamine and carvedilol**

*Neermunda Shabana<sup>a,b</sup>, Ajith Mohan Arjun<sup>a</sup>, Menon Ankitha<sup>b</sup>, Sabarija A Mohandas<sup>c</sup>, Praveena Gangadharan<sup>c,d</sup>, Pathath Abdul Rasheed<sup>a,b\*</sup>*

<sup>a</sup>Department of Biological Sciences and Engineering, Indian Institute of Technology Palakkad, Palakkad, Kerala, India-678 557

<sup>b</sup>Department of Chemistry, Indian Institute of Technology Palakkad, Palakkad, Kerala, India-678 557

<sup>c</sup>Department of Civil Engineering, Indian Institute of Technology Palakkad, Palakkad, Kerala, India-678 557

<sup>d</sup>Environmental Sciences and Sustainable Engineering Center, Indian Institute of Technology, Palakkad, Kerala

\*abdulrasheed@iitpkd.ac.in (PAR)

**Supporting Information**

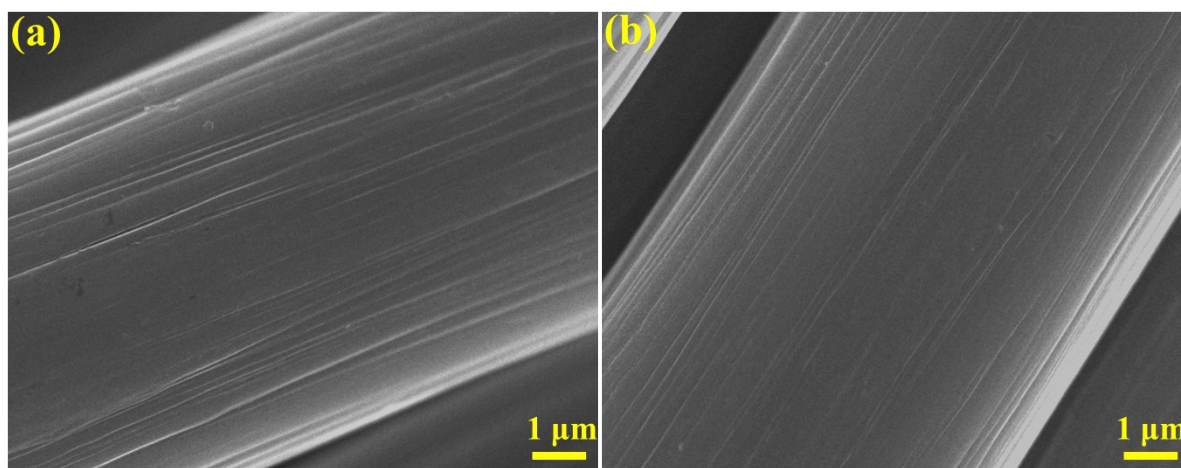

Fig. S1. SEM images of a) bare CC b) CC-DMSO

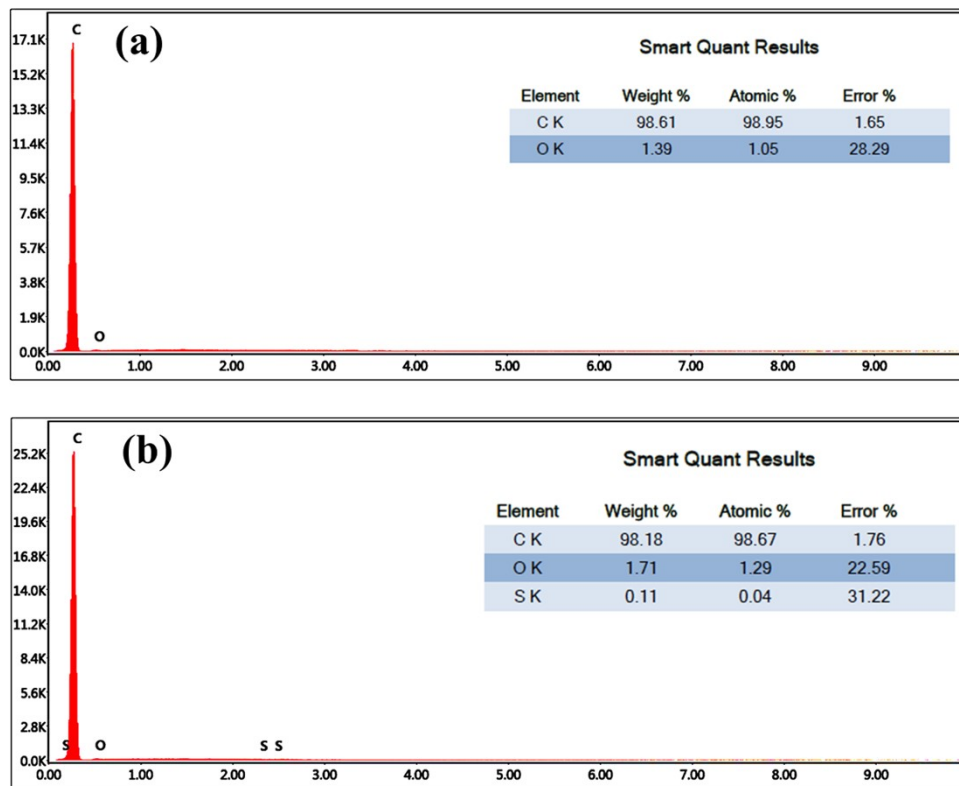

Fig. S2. The EDS spectra with elemental analysis of (a) CC and (b) CC-DMSO.

| Element | Bare CC         |               | CC-DMSO         |               |
|---------|-----------------|---------------|-----------------|---------------|
|         | Atomic conc (%) | Mass conc (%) | Atomic conc (%) | Mass conc (%) |
| C 1s    | 95.66           | 94.30         | 93.86           | 91.90         |
| O 1s    | 4.30            | 5.70          | 5.25            | 6.88          |
| S 2p    | 0               | 0             | 0.89            | 1.22          |

Table S1. The XPS elemental analysis of bare CC and CC-DMSO

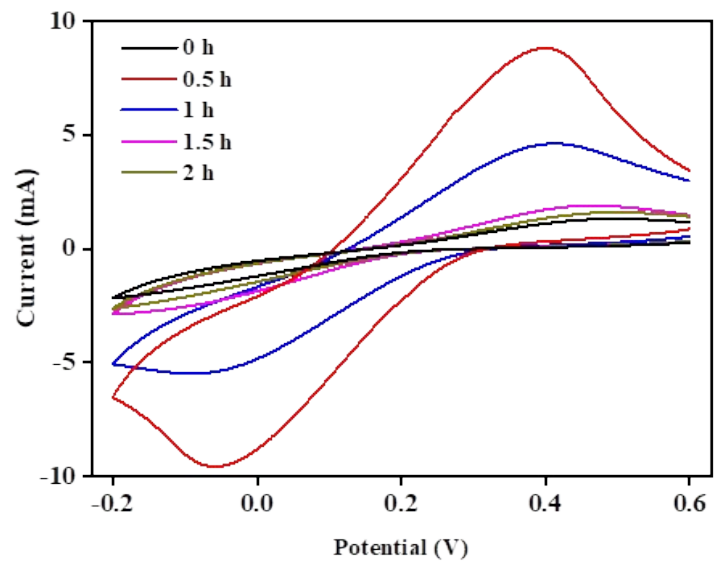

Fig. S3. CV responses of CC-DMSO with varying DMSO modification time in 0.1 M PBS with a scan rate of 100 mV/s.

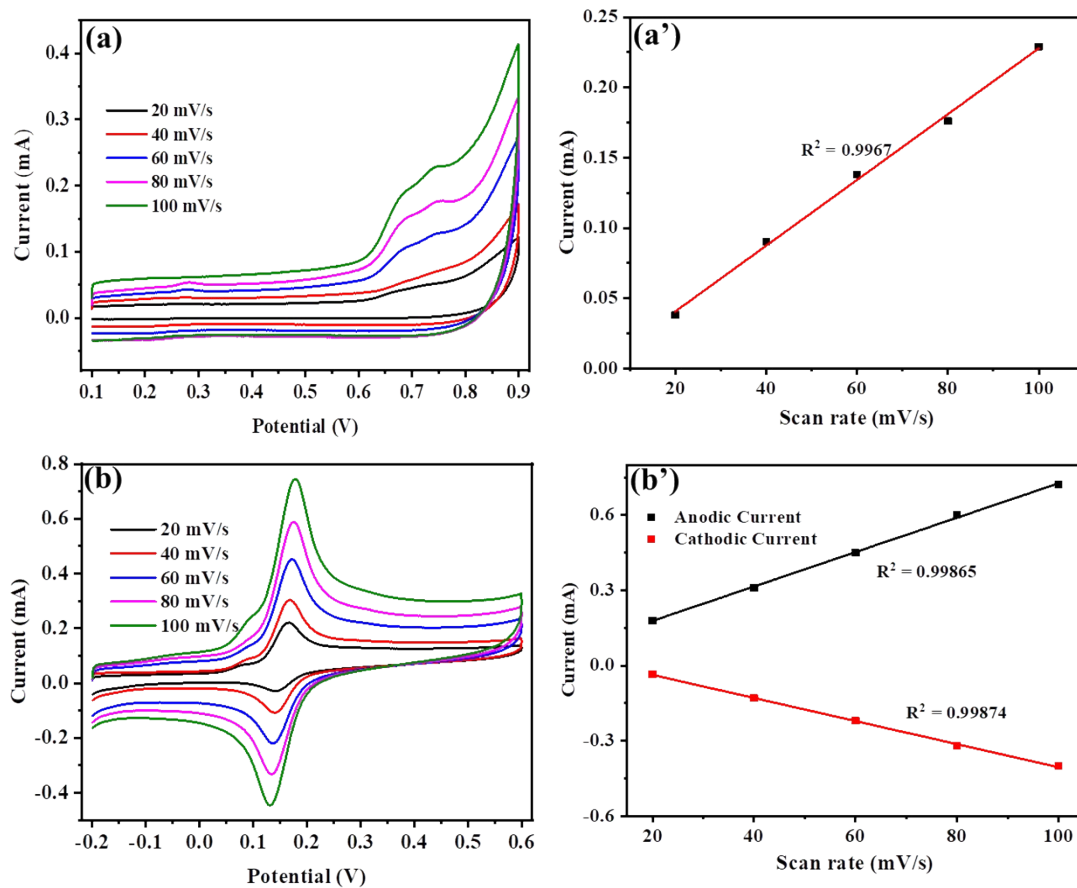

Fig. S4(a) The effect of scan rate of CC-DMSO in presence of 100  $\mu\text{M}$  CAR and (a') its calibration plot. (b) The effect of scan rate of CC-DMSO in presence of 100  $\mu\text{M}$  DA and (b') its calibration plot.

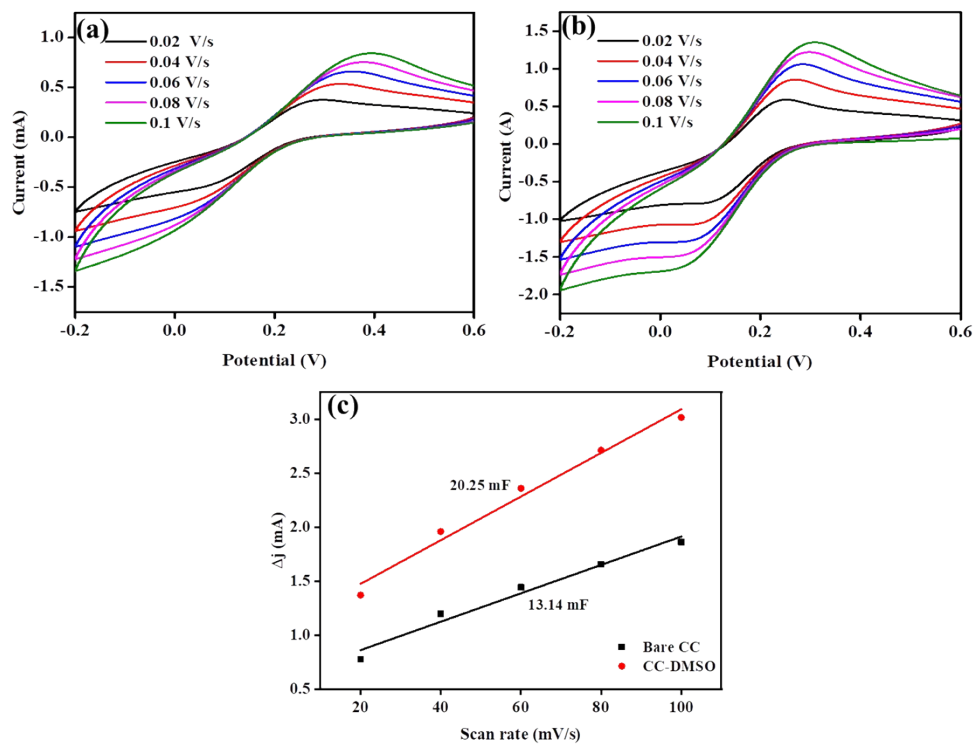

Fig. S5 (a) The CV of (a) bare CC and (b) DMSO-CC at different scan rates. (c) calibration plot of change in current density vs scan rate for CC and DMSO-CC.

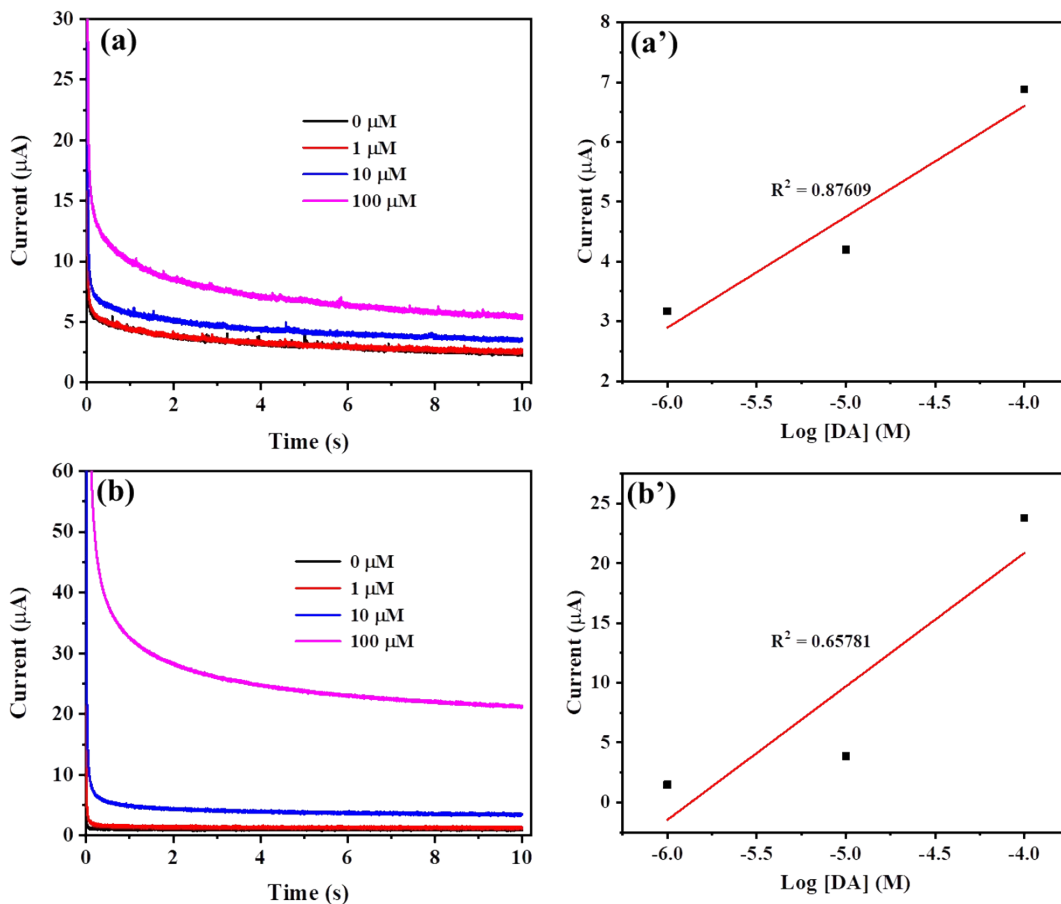

Fig. S6(a) The chronoamperometric response of unmodified CC at a potential of 0.74 V with varying the concentration of CAR and (a') the calibration plot between peak current (at 6 s) vs logarithmic concentration of CAR. (b) The chronoamperometric response of unmodified CC at a potential of 0.18 V with varying the concentration of DA and (b') the calibration plot between peak current (at 6 s) vs logarithmic concentration of DA.

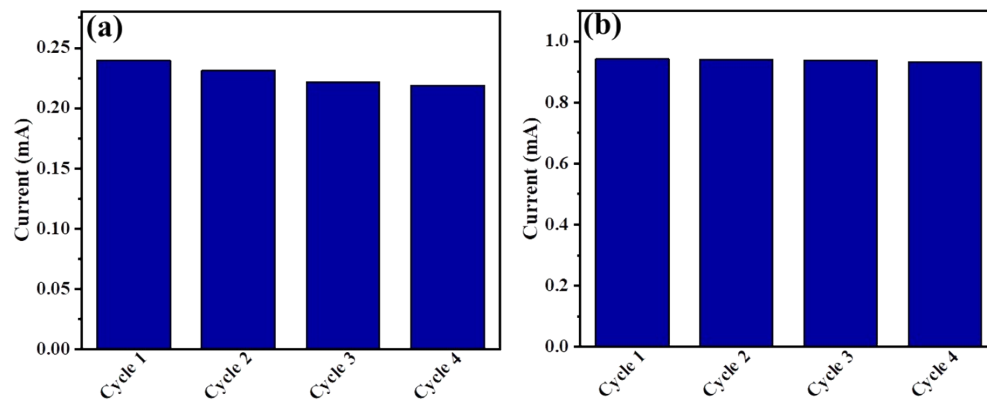

Fig S7. The repeatability of CC-DMSO sensor towards (a) CA detection (b) DA detection.

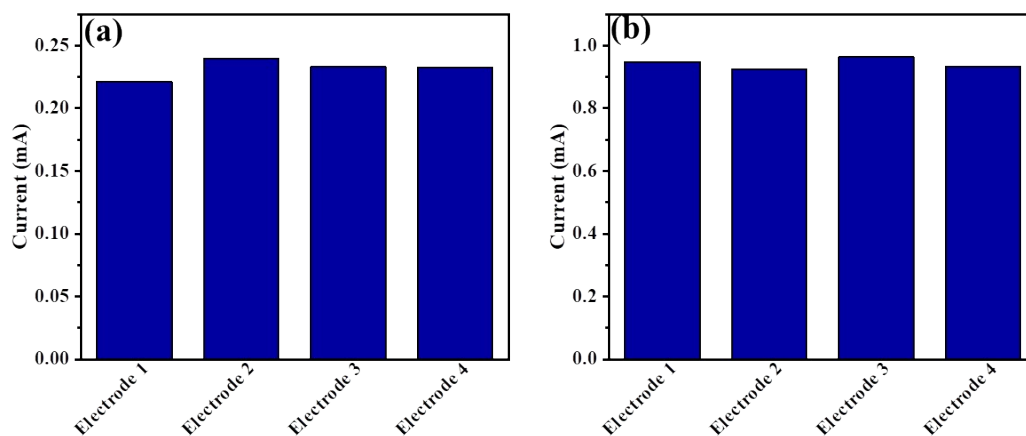

Fig. S8. The reproducibility of CC-DMSO sensor towards (a) CAR detection (b) DA detection.

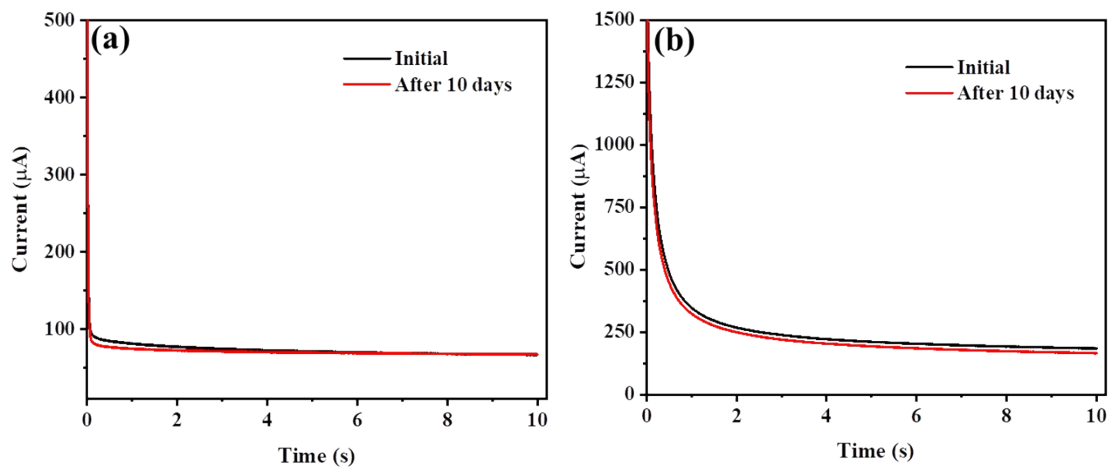

Fig S9. The chronoamperometric response of CC-DMSO after 10 days of storage at 4 °C in comparison with initial value for (a) CAR detection (b) DA detection.
